# Supplementary material for: Evaluation of the coupling of EMACv2.55 and the land surface and vegetation model JSBACHv4
Source: Copernicus journal article supplement (doi:10.5194/egusphere-2023-3051), 2024-01-05
Supplement: Supplementary file 1 [file egusphere-2023-3051-supplement.pdf]

# *Supplement of* **Evaluation of the coupling of EMACv2.55 and the land surface and vegetation model JSBACHv4**

Anna Martin<sup>1</sup>, Veronika Gayler<sup>2</sup>, Benedikt Steil<sup>1</sup>, Klaus Klingmüller<sup>1</sup>, Patrick Jöckel<sup>3</sup>, Holger Tost<sup>4</sup>, Jos Lelieveld<sup>1,5</sup>, and Andrea Pozzer<sup>1,5</sup>

<sup>1</sup>Max Planck Institute for Chemistry, Atmospheric Chemistry Department, 55128 Mainz, Germany

<sup>2</sup>Max Planck Institute for Meteorology, Climate Dynamics Department, 20146 Hamburg, Germany

<sup>3</sup>Deutsches Zentrum für Luft- und Raumfahrt (DLR), Institut für Physik der Atmosphäre, Oberpfaffenhofen, Germany

<sup>4</sup>Johannes Gutenberg–University Mainz, Institute for Physics of the Atmosphere, 55128 Mainz, Germany

<sup>5</sup>The Cyprus Institute, Climate and Atmosphere Research Center, Nicosia, 1645, Cyprus

**Correspondence:** (a.martin@mpic.de)

## Contents

|          |                                                            |           |
|----------|------------------------------------------------------------|-----------|
| <b>1</b> | <b>Input Files</b>                                         | <b>2</b>  |
| <b>2</b> | <b>Example namelist for EMAC/JSBACH: <i>jsbach.nml</i></b> | <b>2</b>  |
| <b>3</b> | <b>Parameter optimisation</b>                              | <b>11</b> |

## 5 1 Input Files

**Table S1.** JSBACH input file overview. *grid* corresponds to the simulation gridsize and *year* to the reference year.

| Initial conditions                        | filename                                                       |
|-------------------------------------------|----------------------------------------------------------------|
| Initial data for the Carbon Pools         | cpools_vga0218_18991231_tiles.nc                               |
| Initial data for soil and land properties | ic_land_soil_grid_1976_tsrf_clim.nc                            |
|                                           | jsbach_grid_11tiles_5layers_year_no-dynveg_layer_moist.nc      |
|                                           | jsbach_grid_11tiles_5layers_year_no-dynveg_albedo.nc           |
|                                           | jsbach_grid_11tiles_5layers_year_no-dynveg_cover_fract.nc      |
|                                           | jsbach_grid_11tiles_5layers_year_no-dynveg_cover_type.nc       |
|                                           | jsbach_grid_11tiles_5layers_year_no-dynveg_nn.nc               |
|                                           | jsbach_grid_11tiles_5layers_year_no-dynveg_soil_layer_depth.nc |
|                                           | jsbach_grid_11tiles_5layers_year_no-dynveg_veg_fract.nc        |
|                                           | bc_land_soil_grid_year_fract_org.nc                            |
|                                           | bc_land_soil_grid_year_nn.nc                                   |

## 2 Example namelist for EMAC/JSBACH: *jsbach.nml*

The following snippets of the jsbach namelist show the default simulation setup for the JSBACH submodel.

```

1: ! *- f90 -*-
10 2: &CTRL
3: l_verbose= F      ! verbose output of model (debugging)
4: /
5: &CPL
6: !#####
15 7: !## JSBACH switches for PROCESS in CALL ORDER FOR DEBUGGING
8: !## DEFAULT = .true.
9: !#####
10:         L_CARBON                = T,
11:         L_FUEL                   = T,
20 12:         L_RADIATION            = T,
13:         L_PHENOLOGY              = T,
14:         L_HYDROLOGY              = T,
15:         L_SEB                    = T,
16:         L_SSE                    = T,
25 17:         L_ASSIMILATION         = T,

```

```

18:         L_TURBULENCE                               = T,
19:         L_DISTURB                                   = T,
20:     !#FUEL
21:         L_update_fuel                               = .true.,
30 22:     !#DISTURBANCE
23:         L_update_natural_disturbances              = .true.,
24:     !#RADIATION
25:         L_update_surface_radiation                 = .true.,
26:     !#PHENOLOGY
35 27:         L_update_phenology_logrop                  = .true.,
28:         L_update_fpc                                = .true.,
29:     !#HYDROLOGY
30:         L_update_snow_and_skin_fraction            = .true.,
31:         L_update_soil_properties                   = .true.,
40 32:     !#SURFACE ENERGY BALANCE
33:         L_update_surface_energy_land               = .true.,
34:         L_update_surface_energy_lake               = .true.,
35:     !#HYDROLOGY
36:         L_update_evaporation                       = .true.,
45 37:     !#SURFACE ENERGY BALANCE
38:         L_update_surface_fluxes_land               = .true.,
39:         L_update_surface_fluxes_lake               = .true.,
40:     !#RADIATION
41:         L_update_radiation_par                     = .true.,
50 42:     !#HYDROLOGY
43:         L_update_surface_hydrology                 = .true.,
44:         L_update_snow_and_skin_fraction            = .true.,
45:     !#SOIL and SNOW ENERGY
46:         L_update_soil_and_snow_properties          = .true.,
55 47:         L_update_soil_and_snow_temperature        = .true.,
48:     !#HYDROLOG
49:         L_update_soil_hydrology                   = .true.,
50:     !#SURFACE ENERGY BALANCE
51:         L_update_snowmelt_correction               = .true.,
60 52:     !#ASSIMILATION
53:         L_update_assimilation_scaling_factors      = .true.,
54:         L_update_canopy_cond_unstressed_assimilation = .true.,
55:         L_update_canopy_cond_stressed_assimilation = .true.,

```

```

56:         L_update_assimilation           = .true.,
65 57:     !#HYDROLOGY
58:         L_update_canopy_cond_unstressed   = .true.,
59:         L_update_water_stress             = .true.,
60:         L_update_canopy_cond_stressed     = .true.,
61:     !#CARBON
70 62:     ! warning CO2 gas tracer must be present!
63:         L_update_C_NPP_pot_allocation     = .true.,
64:     !#TURBULENCE
65:         L_update_humidity_scaling         = .true.,
66:         L_update_roughness                = .true.,
75 67:     !#RADIATION
68:         L_update_albedo                   = .true.,
69:     !#HYDROLOGY
70:         L_update_water_balance            = .true.,
71:     !#####
80 72:     !## JSBACH logical switches
73:     !#####
74:         l_freeze                          = T,
75:         l_supercool                       = T,
76:         l_dynsnow                         = T,
85 77:         l_heat_cap_dyn                   = T,
78:         l_heat_cond_dyn                   = T,
79:         l_ice_on_lakes                    = T,
80:         l_snow                            = T,
81:         l_organic                         = T,
90 82:         ltpe_closed                      = F,
83:         ltpe_open                        = F,
84:         l_forestRegrowth                  = T,
85:         l_use_alb_canopy                  = T,
86:         l_use_alb_veg_simple              = T,
95 87:         l_use_alb_soil_scheme             = F,
88:         l_use_alb_soil_litter             = T,
89:         l_use_alb_mineralsoil_const       = T,
90:         l_use_alb_soil_organic_C          = T, !T: 'linear', F: 'log'
91:         l_burn_pasture                    = T,
100 92:         l_use_quincy                      = F, !QUINCY not implemented
93:     !#####

```

```

94: !## EMAC INPUT DATA
95: !#####
96: ! The following channel objects are just input.
105 97: ! JSBACH will not modify them.
98: input_fract_lake      = 'ECHAM5', 'alake',    ! [1]
99: input_land_mask      = 'ECHAM5', 'slm',      ! [1]
100: input_slf            = 'ECHAM5', 'slf',      ! [1]
101: input_fract_glacier  = 'g3b',    'glac',    ! [1]
110 102: input_press_srf     = 'g3b',    'aps',      ! [Pa]
103: input_t_air          = 'e5vdiff', 'temp2',   ! [K]
104: input_t_acoef        = 'e5vdiff', 'zetnl',   !
      \[1]Richtmyer-morton-coefficients, t=dry static energy, q=moisture
105: input_t_bcoef        = 'e5vdiff', 'zftnl',   ! [J/kg]
115 106: input_t_acoef_wtr  = 'e5vdiff', 'zetnw',   ! [1]
107: input_t_bcoef_wtr   = 'e5vdiff', 'zftnw',   ! [J/kg]
108: input_t_acoef_ice   = 'e5vdiff', 'zetni',   ! [1]
109: input_t_bcoef_ice   = 'e5vdiff', 'zftni',   ! [J/kg]
110: input_q_acoef        = 'e5vdiff', 'zeqnl',   ! [1]
120 111: input_q_bcoef     = 'e5vdiff', 'zfqnl',   ! [kg/kg]
112: input_q_acoef_wtr   = 'e5vdiff', 'zeqnw',   ! [1]
113: input_q_bcoef_wtr   = 'e5vdiff', 'zfqnw',   ! [kg/kg]
114: input_q_acoef_ice   = 'e5vdiff', 'zeqni',   ! [1]
115: input_q_bcoef_ice   = 'e5vdiff', 'zfqni',   ! [kg/kg]
125 116: input_drag_srf    = 'e5vdiff', 'cfhl',    ! (neutral)/ drag coefficients,
      \was cdnl, cdnw, cdni
117: input_drag_wtr      = 'e5vdiff', 'cfhw',    ! [-]
118: input_drag_ice      = 'e5vdiff', 'cfhi',    ! [-]
119: input_pch           = 'e5vdiff', 'chl',     ! surface drag [1]
130 120: input_wind_10m    = 'e5vdiff', 'wind10',  ! [m s-1]
121: input_cos_zenith_angle = 'orbit', 'cossza',  ! [-]
122: input_declination    = 'orbit', 'dec_off',  ! [degrees, angle sun at equator]
123: input_rad_sw_lwtr    = 'rad01', 'soflw',    ! [W m-2]
124: input_rad_sw_lice    = 'rad01', 'sofli',    ! [W m-2]
135 125: input_rad_lw_lwtr  = 'rad01', 'trflw',    ! [W m-2]
126: input_rad_lw_lice    = 'rad01', 'trflw',    ! [W m-2]
127: input_q_rel_air_climbuf = 'e5vdiff', 'rh_2m', ! [-]
128: input_oro_stddev     = 'g3b',    'orostd',  ! [m]
129:

```

```

140 130: ! The following channel objects are just input.
131: ! Only srf level is used.
132: input_wind_u           = 'ECHAM5', 'um1',      ! [m/s]
133: input_wind_v           = 'ECHAM5', 'vm1',      ! [m/s]
134: input_cv_rain          = 'ECHAM5', 'rsfc_2d',  ! [kg m-2 s-1]
145 135: input_ls_rain       = 'ECHAM5', 'rsfl_2d',  ! [kg m-2 s-1]
136: input_cv_snow         = 'ECHAM5', 'ssfc_2d',  ! [kg m-2 s-1]
137: input_ls_snow         = 'ECHAM5', 'ssfl_2d',  ! [kg m-2 s-1]
138: input_lwflx           = 'rad01', 'flxt',      ! [W m-2]
139: input_swflx           = 'rad01', 'flxs',      ! shortwave flux [W m-2]
150 140: input_swnirflx     = 'rad01', 'flxnir',   ! NIR flux all sky [W m-2]
141: input_swvisflx        = 'rad01', 'flxsw1',   ! SW1 flux all sky (VIS) [W m-2]
142: input_lwflx_up        = 'rad01', 'flxut',    ! longwave flux [W m-2]
143: input_swflx_up        = 'rad01', 'flxus',    ! shortwave flux [W m-2]
144:
155 145:
146: ! The following channel objects exist already in MESSy.
147: ! SURFACE did not update those variables, but JSBACH will update them (only over land and
      \lakes)
148: ! either via calculation or according to the jsbach input files.
160 149: input_vol_heat_cap   = 'g3b', 'rgcgn',    ! Volumetric heat capacity of the
      \soil [j/m**3/K]
150: input_az0               = 'g3b', 'az0',      ! roughness length orography [m]
151: input_fract_forest      = 'ECHAM5', 'forest', ! forest fraction [1]
152: input_fract_fpc         = 'ECHAM5', 'vgrat',  ! vegetation fraction rel to land
165      \[1]
153: input_fract_fpc_mon     = 'ECHAM5', 'vgrat',  ! vegetation fraction rel to
      \land, monthly [1]
154: input_latent_hflx       = 'e5vdiff', 'ahfl',   ! latent heat flux [W m-2]
155: input_latent_hflx_lnd   = 'e5vdiff', 'ahfl1', ! latent heat flux over land [W
170      \m-2]
156: input_latent_hflx_wtr   = 'e5vdiff', 'ahflw', ! latent heat flux over water [W
      \m-2]
157: input_latent_hflx_ice   = 'e5vdiff', 'ahfli', ! latent heat flux over ice [W
      \m-2]
175 158: input_sensible_hflx  = 'e5vdiff', 'ahfs',   ! sensible heat flux [W m-2]
159: input_sensible_hflx_lnd = 'e5vdiff', 'ahfsl', ! sensible heat flux over land [W
      \m-2]

```

```

160: input_sensible_hflx_wtr      = 'e5vdiff', 'ahfsw',    ! sensible heat flux over water
    \ [W m-2]
180 161: input_sensible_hflx_ice  = 'e5vdiff', 'ahfsi',    ! sensible heat flux over ice [W
    \ m-2]
162: input_evapo_wtr            = 'e5vdiff', 'evapw',    ! evaporation over water [kg m-2
    \ s-1]
163: input_evapo_ice            = 'e5vdiff', 'evapi',    ! evaporation over ice [kg m-2
185    \ s-1]
164: input_evapopot              = 'e5vdiff', 'evapot_2d', ! potential
    \ evaporation/sublimation [kg m-2 s-1]
165: input_evapl                 = 'e5vdiff', 'evapl_2d', ! evaporation land
166: input_evap                  = 'e5vdiff', 'evap',      ! evaporation
190 167:
168: ! The following channel objects exist already in MESSy and will be updated by JSBACH
169: ! SURFACE did update them before.
170: input_depth_lice            = 'g3b',      'siced',    ! seaice depth [m]
171: input_seaice                 = 'g3b',      'seaice',    ! seaice fraction rel to ocean [1]
195 172: input_seacov              = 'ECHAM5',    'seacov',    ! sea cover (fraction of grid
    \ box) [1]
173: input_landcov                = 'ECHAM5',    'landcov',    ! land cover (fraction of grid
    \ box) [1]
174: input_fract_lice            = 'ECHAM5',    'icecov',    ! ice cover (fract of gb) only
200    \ over water [1]
175: input_water_content         = 'g3b',      'ws',        ! Soil water content [m]
176: input_w_skin                 = 'g3b',      'wl',        ! Water content skin reservoir
    \ (soil&canopy) [m]
177: input_t_unfilt              = 'g3b',      'tslm',      ! T(t)    Surface temperature,
205    \ unfiltered [K]
178: input_t_old                  = 'g3b',      'tslm1',     ! T(t-dt) Surface temperature
    \ t-dt [K]
179: input_t_soil                 = 'g3b',      'tsoil',     ! Temperature [K] in the five
    \ soil layers [K]
210 180: input_tsi                  = 'g3b',      'tsi',       ! Lake surface temperature (ice)
    \ [K]
181: input_t_lwtr                 = 'g3b',      'tsw',       ! surface temperature of water [K]
182: input_t                       = 'ECHAM5',    'tsurf',     ! surface temperature [K]
183: input_snowmelt               = 'g3b',      'snmel',     ! Snow melt [kg/m**2]

```

```

215 184: input_w_snow_can      = 'g3b',      'snc',      ! Snow depth canopy [m water
      \equivalent]
185: input_w_snow_soil      = 'g3b',      'sn',       ! Snow depth ground [m water
      \equivalent]
186: input_w_snow_lice      = 'g3b',      'sni',      ! Snow depth ice [m water
220  \equivalent]
187: input_snow_accum       = 'g3b',      'snacl',    ! Snow budget at non-glacier
      \points [kg/m**2]
188: input_w_glac           = 'g3b',      'gld',      ! Glacier depth (including snow)
      \[m water equivalent]
225 189: input_runoff_glac    = 'g3b',      'rogl',     ! Glacier runoff (rain+snow/ice
      \melt) [kg/m**2]
190: input_adrain           = 'ECHAM5',   'adrain',   ! Drainage at non-glacier points
      \[m]
191: input_aeros            = 'ECHAM5',   'aros',     ! atmospheric runoff [m]
230 192: input_hcap_grnd      = 'g3b',      'grndcapc', ! Heat capacity of the uppermost
      \soil layer [J/m**2/K]
193: input_grnd_hflx        = 'g3b',      'grndhflx', ! Ground heat flux [J m-2 s-1]
194: input_evapo_skin       = 'ECHAM5',   'evwsd',    ! Evaporation from skin reservoir
      \[1]
235 195: input_hflx_cond_ice  = 'g3b',      'ahfice',   ! conductive heat flux [W m-2]
196: input_fract_snow_lice  = 'ECHAM5',   'cvsi',     ! snow cover over ice (fraction
      \of grid box) [1]
197: input_fract_snow_can   = 'ECHAM5',   'cvsc',     ! Fractional snow cover canopy [1]
198: input_fract_snow       = 'ECHAM5',   'cvs',      ! Fractional snow cover [1]
240 199: input_lai            = 'ECHAM5',   'vlt',      ! leaf area index [1]
200: input_wsmx             = 'g3b',      'wsmx',     ! field capacity (water holding
      \capacity) of soil [m]
201: input_grndflux         = 'g3b',      'grndflux', ! grndflux+grndhflx*slm*dtime
      \[W/m**2]
245 202: input_cvw            = 'ECHAM5',   'cvw',      ! Skin reservoir fraction (=
      \pwl/pwlmx, see *vdiff*)
203: input_runoff_hd        = 'g3b',      'runoff',   ! Total runoff non-glacier points
      \ (acc.) [kg/m**2s]
204: input_drainage_hd      = 'ECHAM5',   'adrain',   ! Drainage at non-glacier points
250  \[m/s]
205: input_albedo           = 'rad',      'albedo',   ! surface albedo [1]
206:

```



```

207: !#####
208: !##JSBACH input data /pool/data/JSBACH/...
255 209: !#####
210: ! The following channel objects exist already in MESSy.
211: ! JSBACH will use input data and overwrite the channel objects for the first timestep.
212: input_lai_init          = 'import_grid','in_lai_cl_lai_clim', !initial LAI from
      \climatology [1]
260 213: ! The following channel objects don't exist in MESSy.
214: ! JSBACH will use input data and create new channel objects.
215: input_fract_fpc_max     = 'import_grid','in_jsb_veg_ratio_max',    ! [1]
216: input_rough_m           = 'import_grid','in_alb_roughness_length',! [m]
217: input_vol_field_cap     = 'import_grid','in_jsb_soil_field_cap',    ! [m/m]
265 218: input_cover_type_ti    = 'import_grid','in_jsb_ct_cover_type',    ! [1]
219: input_cover_fract_ti   = 'import_grid','in_jsb_lc_cover_fract',    ! [1]
220: input_w_soil_sl         = 'import_grid','in_jsb_lm_layer_moist',    ! [m]
221: input_soil_depth       = 'import_grid','in_jsb_soil_depth',        ! [m]
222: input_vol_porosity     = 'import_grid','in_jsb_soil_porosity',    ! [m/m]
270 223: input_pore_size_index  = 'import_grid','in_jsb_pore_size_index',    ! [-]
224: input_heat_cond        = 'import_grid','in_jsb_heat_conductivity',! [J m-1 s-1 K-1]
225: input_hyd_cond_sat     = 'import_grid','in_jsb_hyd_cond_sat',      ! [m/s]
226: input_vol_p_wilt       = 'import_grid','in_jsb_wilting_point',     ! [m/m]
227: input_bclapp           = 'import_grid','in_jsb_bclapp',            ! [-]
275 228: input_w_soil_column   = 'import_grid','in_jsb_init_moist',        ! [m]
229: input_max_moist        = 'import_grid','in_jsb_maxmoist',          ! [m]
230: input_root_depth       = 'import_grid','in_jsb_root_depth',        ! [m]
231: input_matrix_pot       = 'import_grid','in_jsb_moisture_pot',      ! [m]
232: input_albedo_veg_vis   = 'import_grid','in_alb_albedo_veg_vis',    ! [1]
280 233: input_albedo_veg_nir  = 'import_grid','in_alb_albedo_veg_nir',    ! [1]
234: input_albedo_soil_vis  = 'import_grid','in_alb_albedo_soil_vis',   ! [1]
235: input_albedo_soil_nir  = 'import_grid','in_alb_albedo_soil_nir',   ! [1]
236: input_tclim            = 'import_grid','in_jsb_ic_surf_temp',      ! [K]
237: input_tclim_sum        = 'import_grid','in_jsb_tc_tclim_sum',      ! [K]
285 238: input_tclim_max       = 'import_grid','in_jsb_tc_tclim_max',      ! [K]
239: input_tclim_min        = 'import_grid','in_jsb_tc_tclim_min',      ! [K]
240: input_tclim_idx        = 'import_grid','in_jsb_tc_tidx',           ! [-]
241: input_fract_org_sl     = 'import_grid','in_fosl_fract_org_sl',     ! [1]
242: input_NPP_pot_yDayMean = 'import_grid','j_NPP_run_mean',           ! [mol (CO2)/m2
290      \ (canopy) s]

```

```

243: !#####
244: !## JSBACH Input Carbon from cpools
245: !#####
246: ! Initial conditions for carbon pools, all in [mol(C)/m^2(canopy)] if not stated
295     \otherwise.
247: input_c_green           = 'import_grid','j_Cpool_green',           ! Green
     \carbon pool: on input last value; updated on output [mol(C)/m^2(canopy) s]:
248: input_c_reserve       = 'import_grid','j_Cpool_reserve',       ! C-pool
     \for carbohydrate reserve (sugars, starches) that allows plants to survive
300 249: input_c_woods       = 'import_grid','j_Cpool_woods',         ! C-pool
     \for stems, thick roots and other (dead) structural
250: input_c_crop_harvest  = 'import_grid','j_Cpool_crop_harvest',   ! C-pool
     \for biomass harvested from crops [mol(C)/m^2(grid box)]
251: input_c_acid_ag1      = 'import_grid','j_YCpool_acid_ag1',     ! Above
305     \ground litter-pool for acid soluble litter
252: input_c_water_ag1     = 'import_grid','j_YCpool_water_ag1',    ! - for
     \water soluble litter
253: input_c_ethanol_ag1   = 'import_grid','j_YCpool_ethanol_ag1',  ! - for
     \ethanol soluble litter
310 254: input_c_nonsoluble_ag1 = 'import_grid','j_YCpool_nonsoluble_ag1', ! -
     \non-soluble soluble litter
255: input_c_acid_bg1      = 'import_grid','j_YCpool_acid_bg1',     ! Below
     \ground litter-pool for acid soluble litter
256: input_c_water_bg1     = 'import_grid','j_YCpool_water_bg1',    ! - for
315     \water soluble litter
257: input_c_ethanol_bg1   = 'import_grid','j_YCpool_ethanol_bg1',  ! - for
     \ethanol soluble litter
258: input_c_nonsoluble_bg1 = 'import_grid','j_YCpool_nonsoluble_bg1', ! - for
     \non-soluble litter
320 259: input_c_humus_1     = 'import_grid','j_YCpool_humus_1',
260: input_c_acid_ag2      = 'import_grid','j_YCpool_acid_ag2',
261: input_c_water_ag2     = 'import_grid','j_YCpool_water_ag2',
262: input_c_ethanol_ag2   = 'import_grid','j_YCpool_ethanol_ag2',
263: input_c_nonsoluble_ag2 = 'import_grid','j_YCpool_nonsoluble_ag2',
325 264: input_c_acid_bg2    = 'import_grid','j_YCpool_acid_bg2',
265: input_c_water_bg2     = 'import_grid','j_YCpool_water_bg2',
266: input_c_ethanol_bg2   = 'import_grid','j_YCpool_ethanol_bg2',
267: input_c_nonsoluble_bg2 = 'import_grid','j_YCpool_nonsoluble_bg2',

```

### 3 Parameter optimisation

**Table S2.** List of optimised parameters of the control simulation (CTRL) and the 35 Simulations with varying parameters including the simulation best fitting the requirements (EMAC/JSBACH).

| Run         | zasic   | zinhomi | zinhoml                    | cmfctop | cprcon [ $e-04s^2 m^{-2}$ ] |
|-------------|---------|---------|----------------------------|---------|-----------------------------|
| EMAC/SRF    | 0.85    | 0.85    | zinhoml <sub>default</sub> | 0.3     | 1                           |
| CTRL        | 0.85    | 0.85    | zinhoml <sub>default</sub> | 0.3     | 1                           |
| 3           | 0.8     | default | default                    | default | default                     |
| 4           | 0.85    | default | default                    | default | default                     |
| 5           | 0.89    | default | default                    | default | default                     |
| 6           | 0.91    | default | default                    | default | default                     |
| 7           | default | 0.8     | default                    | default | default                     |
| 8           | default | 0.85    | default                    | default | default                     |
| 9           | default | 0.9     | default                    | default | default                     |
| 10          | default | 0.95    | default                    | default | default                     |
| 11          | default | 1       | default                    | default | default                     |
| 12          | default | default | 0.7                        | default | default                     |
| 13          | default | default | 0.77                       | default | default                     |
| 14          | default | default | 0.8                        | default | default                     |
| 15          | default | default | 0.9                        | default | default                     |
| EMAC/JSBACH | default | default | 0.92                       | default | default                     |
| 17          | default | default | default                    | 0.2     | default                     |
| 18          | default | default | default                    | 0.23    | default                     |
| 19          | default | default | default                    | 0.26    | default                     |
| 20          | default | default | default                    | 0.3     | default                     |
| 21          | default | default | default                    | 0.35    | default                     |
| 22          | default | default | default                    | default | 1                           |
| 23          | default | default | default                    | default | 2                           |
| 24          | default | default | default                    | default | 3                           |
| 25          | default | default | default                    | default | 4                           |
| 26          | default | default | default                    | default | 5                           |
| 27          | default | default | default                    | default | 6                           |
| 28          | default | default | default                    | default | 8                           |
| 29          | default | default | default                    | default | 9                           |
| 30          | 0.75    | 1       | 0.88                       | 0.3     | 4                           |
| 32          | 0.75    | 1       | 0.88                       | 0.3     | 8                           |
| 33          | 0.75    | 1       | 0.88                       | 0.3     | 10                          |
| 34          | 0.7     | 1       | 0.92                       | 0.3     | 4                           |
| 35          | default | default | 0.92                       | default | 4                           |

**Table S3.** Table of the temporally and globally averaged results  $\pm$  inter annual variability as standard deviation of the CTRL and 35 Simulations with varying tuning parameters (1990 to 2010). Additionally, the corresponding reanalysis or observational results are listed as "REF". For precipitation REF refers to the GPCP monthly precipitation dataset (Adler et al. (2003)), while for the remaining variables REF refers to ERA5/ERA5-Land reanalysis datasets (Hersbach (2023);Muñoz Sabater(2019,2021)).

| Run         | LST<br>[K]    | TOA <sub>net</sub><br>[W m <sup>-2</sup> ] | TOA <sub>sw</sub><br>[W m <sup>-2</sup> ] | TOA <sub>lw</sub><br>[W m <sup>-2</sup> ] | SRF <sub>net</sub><br>[W m <sup>-2</sup> ] | SRF <sub>sw</sub><br>[W m <sup>-2</sup> ] | SRF <sub>lw</sub><br>[W m <sup>-2</sup> ] | HFLX <sub>net</sub><br>[W m <sup>-2</sup> ] | HFLX <sub>sensible</sub><br>[W m <sup>-2</sup> ] | HFLX <sub>latent</sub><br>[W m <sup>-2</sup> ] | Precip<br>[mm day <sup>-1</sup> ] | ACL <sub>C</sub>  | LWC<br>[kg m <sup>-2</sup> ] | IWC<br>[kg m <sup>-2</sup> ] | TWS<br>[m]        |
|-------------|---------------|--------------------------------------------|-------------------------------------------|-------------------------------------------|--------------------------------------------|-------------------------------------------|-------------------------------------------|---------------------------------------------|--------------------------------------------------|------------------------------------------------|-----------------------------------|-------------------|------------------------------|------------------------------|-------------------|
| REF         | 282.25 ± 0.27 | 0.45 ± 0.65                                | 242.67 ± 0.65                             | -242.22 ± 0.29                            | 105.91 ± 0.45                              | 163.76 ± 0.54                             | -57.85 ± 0.31                             | -69.92 ± 0.57                               | -28.15 ± 0.68                                    | -41.76 ± 0.43                                  | 2.7 ± 0.03                        | 0.553 ± 0.00405   | 0.04707 ± 0.00098            | 0.02166 ± 0.00033            | 1.06012 ± 0.00947 |
| EMAC/SRF    | 283.09 ± 0.27 | 3.56 ± 0.39                                | 234.33 ± 0.27                             | -230.77 ± 0.34                            | 107.92 ± 0.24                              | 161.74 ± 0.31                             | -53.83 ± 0.3                              | -104.24 ± 0.35                              | -16.74 ± 0.18                                    | -87.5 ± 0.42                                   | 2.83 ± 0.02                       | 1.06067 ± 0.00444 | 0.10394 ± 0.00115            | 0.04972 ± 0.00068            | 0.34995 ± 0.00425 |
| CTRL        | 280.71 ± 0.26 | 7.41 ± 0.47                                | 237.46 ± 0.37                             | -230.06 ± 0.39                            | 108.52 ± 0.25                              | 166.09 ± 0.45                             | -57.58 ± 0.4                              | -110.68 ± 0.43                              | -11.68 ± 0.11                                    | -99.0 ± 0.45                                   | 2.75 ± 0.02                       | 0.6452 ± 0.0032   | 0.09538 ± 0.00114            | 0.04943 ± 0.00068            | 1.00555 ± 0.00291 |
| Test3       | 280.54 ± 0.28 | 5.06 ± 0.51                                | 235.54 ± 0.29                             | -230.48 ± 0.38                            | 106.76 ± 0.25                              | 164.66 ± 0.39                             | -57.91 ± 0.43                             | -111.01 ± 0.59                              | -11.7 ± 0.16                                     | -99.31 ± 0.55                                  | 2.77 ± 0.02                       | 0.6466 ± 0.0025   | 0.0959 ± 0.00159             | 0.04976 ± 0.00066            | 1.00345 ± 0.00823 |
| Test4       | 280.66 ± 0.26 | 6.61 ± 0.5                                 | 237.22 ± 0.3                              | -230.61 ± 0.42                            | 108.08 ± 0.28                              | 165.97 ± 0.36                             | -57.88 ± 0.35                             | -110.92 ± 0.65                              | -11.59 ± 0.15                                    | -99.33 ± 0.6                                   | 2.77 ± 0.02                       | 0.6462 ± 0.0025   | 0.09594 ± 0.00114            | 0.04945 ± 0.00067            | 1.00362 ± 0.00761 |
| Test5       | 280.73 ± 0.27 | 8.06 ± 0.43                                | 238.78 ± 0.31                             | -230.72 ± 0.37                            | 109.31 ± 0.26                              | 167.24 ± 0.38                             | -57.93 ± 0.36                             | -110.81 ± 0.64                              | -11.6 ± 0.12                                     | -99.21 ± 0.62                                  | 2.76 ± 0.02                       | 0.646 ± 0.0022    | 0.09552 ± 0.00114            | 0.04936 ± 0.00063            | 1.00336 ± 0.00878 |
| Test6       | 280.85 ± 0.29 | 8.63 ± 0.53                                | 239.5 ± 0.31                              | -230.87 ± 0.39                            | 109.92 ± 0.25                              | 167.76 ± 0.4                              | -57.83 ± 0.37                             | -110.84 ± 0.64                              | -11.6 ± 0.15                                     | -99.24 ± 0.65                                  | 2.76 ± 0.02                       | 0.6453 ± 0.0022   | 0.09582 ± 0.00127            | 0.04919 ± 0.00059            | 1.0033 ± 0.0086   |
| Test7       | 280.6 ± 0.29  | 6.67 ± 0.42                                | 237.87 ± 0.35                             | -231.2 ± 0.41                             | 108.53 ± 0.32                              | 166.66 ± 0.39                             | -58.14 ± 0.37                             | -111.28 ± 0.61                              | -11.72 ± 0.14                                    | -99.56 ± 0.59                                  | 2.77 ± 0.02                       | 0.6465 ± 0.0027   | 0.09529 ± 0.00098            | 0.04955 ± 0.00061            | 1.00326 ± 0.00943 |
| Test8       | 280.66 ± 0.26 | 6.61 ± 0.5                                 | 237.22 ± 0.3                              | -230.61 ± 0.42                            | 108.08 ± 0.28                              | 165.97 ± 0.36                             | -57.88 ± 0.35                             | -110.92 ± 0.65                              | -11.59 ± 0.15                                    | -99.33 ± 0.6                                   | 2.77 ± 0.02                       | 0.6462 ± 0.0025   | 0.09594 ± 0.00114            | 0.04945 ± 0.00067            | 1.00362 ± 0.00761 |
| Test9       | 280.73 ± 0.27 | 6.35 ± 0.42                                | 236.5 ± 0.24                              | -230.15 ± 0.34                            | 107.56 ± 0.26                              | 165.2 ± 0.3                               | -57.64 ± 0.35                             | -110.55 ± 0.6                               | -11.58 ± 0.11                                    | -98.97 ± 0.58                                  | 2.76 ± 0.02                       | 0.6462 ± 0.0018   | 0.09652 ± 0.00112            | 0.04933 ± 0.00055            | 1.0034 ± 0.00672  |
| Test10      | 280.73 ± 0.27 | 6.48 ± 0.46                                | 236.0 ± 0.31                              | -229.52 ± 0.45                            | 107.19 ± 0.29                              | 164.69 ± 0.34                             | -57.5 ± 0.33                              | -110.04 ± 0.59                              | -11.55 ± 0.14                                    | -98.48 ± 0.58                                  | 2.74 ± 0.02                       | 0.6465 ± 0.0028   | 0.09637 ± 0.00111            | 0.04942 ± 0.00057            | 1.00328 ± 0.00819 |
| Test11      | 280.75 ± 0.26 | 6.34 ± 0.49                                | 235.32 ± 0.36                             | -228.98 ± 0.33                            | 106.71 ± 0.31                              | 163.97 ± 0.43                             | -57.26 ± 0.39                             | -109.6 ± 0.58                               | -11.49 ± 0.14                                    | -98.1 ± 0.55                                   | 2.73 ± 0.02                       | 0.6474 ± 0.0024   | 0.09708 ± 0.00096            | 0.049 ± 0.00052              | 1.00239 ± 0.00791 |
| Test12      | 280.58 ± 0.28 | 5.66 ± 0.44                                | 236.32 ± 0.32                             | -230.65 ± 0.39                            | 106.91 ± 0.33                              | 164.94 ± 0.37                             | -58.02 ± 0.35                             | -110.57 ± 0.62                              | -11.59 ± 0.17                                    | -98.97 ± 0.61                                  | 2.76 ± 0.02                       | 0.6456 ± 0.0026   | 0.09557 ± 0.00096            | 0.04952 ± 0.00049            | 1.00348 ± 0.00838 |
| Test13      | 280.57 ± 0.28 | 4.84 ± 0.42                                | 235.5 ± 0.34                              | -230.67 ± 0.35                            | 106.06 ± 0.27                              | 164.01 ± 0.43                             | -57.95 ± 0.4                              | -110.55 ± 0.54                              | -11.63 ± 0.17                                    | -98.93 ± 0.53                                  | 2.76 ± 0.02                       | 0.6455 ± 0.0031   | 0.09529 ± 0.00108            | 0.04946 ± 0.00061            | 1.00356 ± 0.00795 |
| Test14      | 280.53 ± 0.28 | 4.4 ± 0.47                                 | 235.04 ± 0.3                              | -230.64 ± 0.39                            | 105.67 ± 0.24                              | 163.47 ± 0.38                             | -57.8 ± 0.36                              | -110.57 ± 0.59                              | -11.65 ± 0.13                                    | -98.92 ± 0.57                                  | 2.76 ± 0.02                       | 0.6462 ± 0.0027   | 0.09533 ± 0.00104            | 0.04946 ± 0.00058            | 1.00368 ± 0.0075  |
| Test15      | 280.55 ± 0.26 | 3.48 ± 0.39                                | 234.1 ± 0.37                              | -230.62 ± 0.41                            | 104.62 ± 0.29                              | 162.42 ± 0.44                             | -57.79 ± 0.39                             | -110.5 ± 0.67                               | -11.57 ± 0.13                                    | -98.93 ± 0.63                                  | 2.76 ± 0.02                       | 0.6457 ± 0.0035   | 0.09531 ± 0.00098            | 0.04942 ± 0.00049            | 1.00327 ± 0.00821 |
| EMAC/JSBACH | 280.48 ± 0.23 | 3.23 ± 0.38                                | 233.86 ± 0.29                             | -230.63 ± 0.38                            | 104.43 ± 0.3                               | 162.14 ± 0.34                             | -57.71 ± 0.35                             | -110.47 ± 0.67                              | -11.67 ± 0.14                                    | -98.79 ± 0.61                                  | 2.76 ± 0.02                       | 0.6464 ± 0.0028   | 0.09519 ± 0.0009             | 0.04936 ± 0.00054            | 1.00385 ± 0.00815 |
| Test17      | 280.6 ± 0.23  | 3.89 ± 0.46                                | 234.27 ± 0.31                             | -230.38 ± 0.37                            | 105.94 ± 0.28                              | 162.71 ± 0.38                             | -56.77 ± 0.37                             | -111.4 ± 0.58                               | -11.82 ± 0.14                                    | -99.58 ± 0.55                                  | 2.78 ± 0.02                       | 0.6578 ± 0.0025   | 0.09687 ± 0.00121            | 0.04916 ± 0.00063            | 1.00379 ± 0.00819 |
| Test18      | 280.63 ± 0.23 | 4.81 ± 0.4                                 | 235.27 ± 0.33                             | -230.46 ± 0.37                            | 106.67 ± 0.27                              | 163.83 ± 0.41                             | -57.16 ± 0.41                             | -111.22 ± 0.6                               | -11.78 ± 0.15                                    | -99.44 ± 0.58                                  | 2.77 ± 0.02                       | 0.654 ± 0.0027    | 0.09656 ± 0.00118            | 0.04918 ± 0.0006             | 1.00344 ± 0.00751 |
| Test19      | 280.64 ± 0.21 | 5.59 ± 0.44                                | 236.14 ± 0.29                             | -230.56 ± 0.42                            | 107.32 ± 0.24                              | 164.77 ± 0.41                             | -57.45 ± 0.44                             | -111.11 ± 0.67                              | -11.72 ± 0.16                                    | -99.39 ± 0.63                                  | 2.77 ± 0.02                       | 0.6506 ± 0.0026   | 0.09622 ± 0.00136            | 0.04941 ± 0.00068            | 1.00382 ± 0.0075  |
| Test20      | 280.66 ± 0.26 | 6.61 ± 0.5                                 | 237.22 ± 0.3                              | -230.61 ± 0.42                            | 108.08 ± 0.28                              | 165.97 ± 0.36                             | -57.88 ± 0.35                             | -110.92 ± 0.65                              | -11.59 ± 0.15                                    | -99.33 ± 0.6                                   | 2.77 ± 0.02                       | 0.6462 ± 0.0025   | 0.09594 ± 0.00114            | 0.04945 ± 0.00067            | 1.00362 ± 0.00761 |
| Test21      | 280.69 ± 0.28 | 7.64 ± 0.37                                | 238.32 ± 0.24                             | -230.68 ± 0.34                            | 108.9 ± 0.26                               | 167.18 ± 0.27                             | -58.27 ± 0.32                             | -110.69 ± 0.61                              | -11.6 ± 0.17                                     | -99.09 ± 0.61                                  | 2.76 ± 0.02                       | 0.6424 ± 0.0025   | 0.09519 ± 0.00094            | 0.04968 ± 0.00063            | 1.00316 ± 0.00774 |
| Test22      | 280.66 ± 0.26 | 6.61 ± 0.5                                 | 237.22 ± 0.3                              | -230.61 ± 0.42                            | 108.08 ± 0.28                              | 165.97 ± 0.36                             | -57.88 ± 0.35                             | -110.92 ± 0.65                              | -11.59 ± 0.15                                    | -99.33 ± 0.6                                   | 2.77 ± 0.02                       | 0.6462 ± 0.0025   | 0.09594 ± 0.00114            | 0.04945 ± 0.00067            | 1.00362 ± 0.00761 |
| Test23      | 280.49 ± 0.26 | 6.85 ± 0.48                                | 241.36 ± 0.35                             | -234.51 ± 0.32                            | 111.04 ± 0.22                              | 170.57 ± 0.48                             | -59.53 ± 0.48                             | -113.5 ± 0.66                               | -11.91 ± 0.13                                    | -101.59 ± 0.63                                 | 2.84 ± 0.02                       | 0.6267 ± 0.0029   | 0.08383 ± 0.00098            | 0.03996 ± 0.00057            | 1.00189 ± 0.00737 |
| Test24      | 280.41 ± 0.22 | 6.29 ± 0.41                                | 242.5 ± 0.28                              | -236.21 ± 0.33                            | 111.74 ± 0.26                              | 171.84 ± 0.35                             | -60.09 ± 0.36                             | -114.76 ± 0.56                              | -12.06 ± 0.12                                    | -102.7 ± 0.57                                  | 2.87 ± 0.02                       | 0.619 ± 0.0026    | 0.07962 ± 0.00066            | 0.0366 ± 0.00056             | 1.0015 ± 0.00797  |
| Test25      | 280.4 ± 0.27  | 5.88 ± 0.43                                | 243.13 ± 0.32                             | -237.25 ± 0.33                            | 112.06 ± 0.23                              | 172.56 ± 0.46                             | -60.51 ± 0.48                             | -115.45 ± 0.65                              | -12.16 ± 0.14                                    | -103.29 ± 0.63                                 | 2.89 ± 0.02                       | 0.6133 ± 0.0028   | 0.07735 ± 0.00073            | 0.0349 ± 0.00056             | 1.00089 ± 0.00818 |
| Test26      | 280.35 ± 0.26 | 5.59 ± 0.39                                | 243.44 ± 0.29                             | -237.85 ± 0.36                            | 112.25 ± 0.25                              | 172.9 ± 0.37                              | -60.65 ± 0.35                             | -115.92 ± 0.59                              | -12.18 ± 0.1                                     | -103.74 ± 0.61                                 | 2.91 ± 0.02                       | 0.6099 ± 0.0026   | 0.07629 ± 0.00061            | 0.03385 ± 0.00087            | 1.00167 ± 0.00813 |
| Test27      | 280.34 ± 0.25 | 5.31 ± 0.38                                | 243.62 ± 0.31                             | -238.31 ± 0.29                            | 112.33 ± 0.24                              | 173.11 ± 0.41                             | -60.78 ± 0.43                             | -116.21 ± 0.56                              | -12.26 ± 0.13                                    | -103.95 ± 0.6                                  | 2.92 ± 0.02                       | 0.6069 ± 0.0034   | 0.07533 ± 0.00071            | 0.03305 ± 0.00042            | 1.0011 ± 0.00768  |
| Test28      | 280.28 ± 0.28 | 5.11 ± 0.37                                | 243.93 ± 0.37                             | -238.82 ± 0.28                            | 112.48 ± 0.26                              | 173.47 ± 0.47                             | -60.99 ± 0.47                             | -116.58 ± 0.61                              | -12.36 ± 0.16                                    | -104.22 ± 0.61                                 | 2.92 ± 0.02                       | 0.6036 ± 0.0033   | 0.07422 ± 0.00081            | 0.03216 ± 0.00043            | 1.00115 ± 0.00858 |
| Test29      | 280.32 ± 0.3  | 4.95 ± 0.43                                | 244.0 ± 0.35                              | -239.05 ± 0.35                            | 112.49 ± 0.27                              | 173.54 ± 0.46                             | -61.05 ± 0.45                             | -116.73 ± 0.59                              | -12.32 ± 0.18                                    | -104.41 ± 0.58                                 | 2.93 ± 0.02                       | 0.6018 ± 0.0033   | 0.07398 ± 0.00073            | 0.03186 ± 0.00042            | 1.00108 ± 0.00824 |
| Test30      | 280.17 ± 0.31 | 0.54 ± 0.41                                | 236.07 ± 0.28                             | -235.53 ± 0.36                            | 105.78 ± 0.26                              | 165.57 ± 0.35                             | -59.79 ± 0.39                             | -114.13 ± 0.62                              | -11.99 ± 0.14                                    | -102.14 ± 0.61                                 | 2.87 ± 0.02                       | 0.6146 ± 0.0025   | 0.07776 ± 0.00067            | 0.03467 ± 0.0005             | 1.00037 ± 0.00886 |
| Test32      | 280.08 ± 0.28 | -0.08 ± 0.43                               | 237.09 ± 0.34                             | -237.17 ± 0.27                            | 106.35 ± 0.23                              | 166.66 ± 0.46                             | -60.31 ± 0.47                             | -115.27 ± 0.55                              | -12.13 ± 0.13                                    | -103.13 ± 0.6                                  | 2.9 ± 0.02                        | 0.6062 ± 0.0024   | 0.07447 ± 0.0008             | 0.03201 ± 0.00055            | 1.00072 ± 0.00858 |
| Test33      | 280.07 ± 0.28 | -0.19 ± 0.45                               | 237.34 ± 0.42                             | -237.52 ± 0.35                            | 106.52 ± 0.29                              | 166.92 ± 0.52                             | -60.4 ± 0.42                              | -115.57 ± 0.61                              | -12.16 ± 0.14                                    | -103.41 ± 0.58                                 | 2.91 ± 0.02                       | 0.6028 ± 0.0037   | 0.07393 ± 0.00063            | 0.03153 ± 0.00041            | 1.00103 ± 0.00849 |
| Test34      | 280.06 ± 0.25 | -0.89 ± 0.36                               | 234.44 ± 0.36                             | -235.33 ± 0.35                            | 104.42 ± 0.28                              | 164.15 ± 0.44                             | -59.73 ± 0.41                             | -114.11 ± 0.54                              | -12.01 ± 0.16                                    | -102.09 ± 0.52                                 | 2.87 ± 0.01                       | 0.6168 ± 0.0031   | 0.07773 ± 0.00069            | 0.03483 ± 0.0005             | 1.00153 ± 0.00794 |
| Test35      | 280.21 ± 0.25 | 2.53 ± 0.44                                | 239.73 ± 0.39                             | -237.2 ± 0.33                             | 108.41 ± 0.26                              | 168.65 ± 0.51                             | -60.24 ± 0.44                             | -114.97 ± 0.58                              | -12.15 ± 0.13                                    | -102.82 ± 0.58                                 | 2.88 ± 0.02                       | 0.6129 ± 0.003    | 0.0771 ± 0.00081             | 0.03461 ± 0.00046            | 1.00171 ± 0.00781 |

**Table S4.** Root mean square error (RMSE) and normalised RMSE by the range of the reference data (NRMSE) of reference data minus simulation for the analysed time period (1990 to 2010).

| Run              | LST<br>[K] | TOA <sub>net</sub><br>[W m <sup>-2</sup> ] | TOA <sub>sw</sub><br>[W m <sup>-2</sup> ] | TOA <sub>lw</sub><br>[W m <sup>-2</sup> ] | SRF <sub>net</sub><br>[W m <sup>-2</sup> ] | SRF <sub>sw</sub><br>[W m <sup>-2</sup> ] | SRF <sub>lw</sub><br>[W m <sup>-2</sup> ] | HFLX <sub>net</sub><br>[W m <sup>-2</sup> ] | HFLX <sub>sensible</sub><br>[W m <sup>-2</sup> ] | HFLX <sub>latent</sub><br>[W m <sup>-2</sup> ] | Precip<br>[mm day <sup>-1</sup> ] | ACLC  | LWC<br>[kg m <sup>-2</sup> ] | IWC<br>[kg m <sup>-2</sup> ] | TWS<br>[m] |
|------------------|------------|--------------------------------------------|-------------------------------------------|-------------------------------------------|--------------------------------------------|-------------------------------------------|-------------------------------------------|---------------------------------------------|--------------------------------------------------|------------------------------------------------|-----------------------------------|-------|------------------------------|------------------------------|------------|
| CTRL RSME        | 4.862      | 9.6                                        | 6.954                                     | 12.382                                    | 5.781                                      | 5.5                                       | 0.966                                     | 42.622                                      | 5.116                                            | 15.632                                         | 0.082                             | 0.019 | 0.042                        | 0.027                        | 0.058      |
| CTRL NRSME       | 0.347      | 0.436                                      | 0.401                                     | 1.605                                     | 0.318                                      | 0.315                                     | 0.222                                     | 1.123                                       | 1.117                                            | 1.202                                          | 0.25                              | 0.527 | 2.898                        | 10.755                       | 0.635      |
| Test:3 RSME      | 4.919      | 8.068                                      | 8.49                                      | 11.971                                    | 5.228                                      | 5.055                                     | 0.942                                     | 42.944                                      | 5.101                                            | 15.948                                         | 0.097                             | 0.02  | 0.042                        | 0.028                        | 0.06       |
| Test:3 NRSME     | 0.351      | 0.366                                      | 0.49                                      | 1.552                                     | 0.288                                      | 0.29                                      | 0.217                                     | 1.132                                       | 1.114                                            | 1.226                                          | 0.295                             | 0.564 | 2.934                        | 10.888                       | 0.663      |
| Test:4 RSME      | 4.88       | 9.044                                      | 7.131                                     | 11.839                                    | 5.6                                        | 5.441                                     | 0.909                                     | 42.858                                      | 5.205                                            | 15.966                                         | 0.092                             | 0.02  | 0.042                        | 0.027                        | 0.06       |
| Test:4 NRSME     | 0.349      | 0.411                                      | 0.411                                     | 1.535                                     | 0.308                                      | 0.312                                     | 0.209                                     | 1.129                                       | 1.136                                            | 1.227                                          | 0.28                              | 0.554 | 2.936                        | 10.765                       | 0.66       |
| Test:5 RSME      | 4.856      | 10.086                                     | 6.024                                     | 11.731                                    | 6.18                                       | 6.069                                     | 0.915                                     | 42.753                                      | 5.189                                            | 15.844                                         | 0.086                             | 0.019 | 0.042                        | 0.027                        | 0.06       |
| Test:5 NRSME     | 0.347      | 0.458                                      | 0.348                                     | 1.521                                     | 0.34                                       | 0.348                                     | 0.21                                      | 1.127                                       | 1.133                                            | 1.218                                          | 0.261                             | 0.548 | 2.907                        | 10.727                       | 0.664      |
| Test:6 RSME      | 4.822      | 10.524                                     | 5.586                                     | 11.58                                     | 6.537                                      | 6.382                                     | 0.917                                     | 42.781                                      | 5.198                                            | 15.882                                         | 0.088                             | 0.019 | 0.042                        | 0.027                        | 0.06       |
| Test:6 NRSME     | 0.345      | 0.478                                      | 0.322                                     | 1.501                                     | 0.36                                       | 0.366                                     | 0.211                                     | 1.127                                       | 1.135                                            | 1.221                                          | 0.268                             | 0.53  | 2.928                        | 10.661                       | 0.665      |
| Test:7 RSME      | 4.9        | 9.08                                       | 6.651                                     | 11.261                                    | 5.789                                      | 5.76                                      | 0.961                                     | 43.206                                      | 5.073                                            | 16.191                                         | 0.099                             | 0.02  | 0.027                        | 0.042                        | 0.06       |
| Test:7 NRSME     | 0.35       | 0.412                                      | 0.384                                     | 1.46                                      | 0.319                                      | 0.33                                      | 0.221                                     | 1.139                                       | 1.108                                            | 1.245                                          | 0.3                               | 0.562 | 2.891                        | 10.802                       | 0.667      |
| Test:8 RSME      | 4.88       | 9.044                                      | 7.131                                     | 11.839                                    | 5.6                                        | 5.441                                     | 0.909                                     | 42.858                                      | 5.205                                            | 15.966                                         | 0.092                             | 0.02  | 0.042                        | 0.027                        | 0.06       |
| Test:8 NRSME     | 0.349      | 0.411                                      | 0.411                                     | 1.535                                     | 0.308                                      | 0.312                                     | 0.209                                     | 1.129                                       | 1.136                                            | 1.227                                          | 0.28                              | 0.554 | 2.936                        | 10.765                       | 0.66       |
| Test:9 RSME      | 4.858      | 8.864                                      | 7.698                                     | 12.292                                    | 5.417                                      | 5.172                                     | 0.935                                     | 42.505                                      | 5.215                                            | 15.614                                         | 0.087                             | 0.02  | 0.043                        | 0.027                        | 0.06       |
| Test:9 NRSME     | 0.347      | 0.403                                      | 0.444                                     | 1.593                                     | 0.298                                      | 0.296                                     | 0.215                                     | 1.12                                        | 1.139                                            | 1.2                                            | 0.264                             | 0.554 | 2.976                        | 10.716                       | 0.661      |
| Test:10 RSME     | 4.858      | 8.95                                       | 8.106                                     | 12.909                                    | 5.318                                      | 5.058                                     | 0.968                                     | 42.013                                      | 5.241                                            | 15.133                                         | 0.076                             | 0.02  | 0.043                        | 0.027                        | 0.06       |
| Test:10 NRSME    | 0.347      | 0.406                                      | 0.468                                     | 1.674                                     | 0.293                                      | 0.29                                      | 0.222                                     | 1.107                                       | 1.144                                            | 1.163                                          | 0.232                             | 0.562 | 2.965                        | 10.751                       | 0.664      |
| Test:11 RSME     | 4.851      | 8.861                                      | 8.676                                     | 13.442                                    | 5.223                                      | 4.981                                     | 1.098                                     | 41.593                                      | 5.297                                            | 14.757                                         | 0.07                              | 0.021 | 0.043                        | 0.027                        | 0.061      |
| Test:11 NRSME    | 0.347      | 0.402                                      | 0.501                                     | 1.743                                     | 0.288                                      | 0.285                                     | 0.252                                     | 1.096                                       | 1.157                                            | 1.134                                          | 0.213                             | 0.585 | 3.014                        | 10.584                       | 0.673      |
| Test:12 RSME     | 4.904      | 8.424                                      | 7.847                                     | 11.798                                    | 5.259                                      | 5.11                                      | 0.925                                     | 42.521                                      | 5.201                                            | 15.616                                         | 0.087                             | 0.019 | 0.042                        | 0.027                        | 0.06       |
| Test:12 NRSME    | 0.35       | 0.383                                      | 0.453                                     | 1.529                                     | 0.29                                       | 0.293                                     | 0.213                                     | 1.121                                       | 1.135                                            | 1.2                                            | 0.265                             | 0.538 | 2.91                         | 10.789                       | 0.663      |
| Test:13 RSME     | 4.909      | 7.938                                      | 8.519                                     | 11.782                                    | 5.161                                      | 4.983                                     | 0.932                                     | 42.506                                      | 5.167                                            | 15.565                                         | 0.085                             | 0.019 | 0.042                        | 0.027                        | 0.06       |
| Test:13 NRSME    | 0.351      | 0.36                                       | 0.491                                     | 1.527                                     | 0.284                                      | 0.285                                     | 0.214                                     | 1.12                                        | 1.128                                            | 1.196                                          | 0.26                              | 0.535 | 2.891                        | 10.766                       | 0.661      |
| Test:14 RSME     | 4.925      | 7.706                                      | 8.913                                     | 11.809                                    | 5.162                                      | 4.98                                      | 0.914                                     | 42.523                                      | 5.147                                            | 15.564                                         | 0.086                             | 0.02  | 0.042                        | 0.027                        | 0.06       |
| Test:14 NRSME    | 0.352      | 0.35                                       | 0.514                                     | 1.531                                     | 0.284                                      | 0.285                                     | 0.21                                      | 1.121                                       | 1.124                                            | 1.196                                          | 0.263                             | 0.554 | 2.894                        | 10.767                       | 0.659      |
| Test:15 RSME     | 4.916      | 7.277                                      | 9.732                                     | 11.834                                    | 5.317                                      | 5.154                                     | 0.926                                     | 42.457                                      | 5.219                                            | 15.569                                         | 0.085                             | 0.019 | 0.042                        | 0.027                        | 0.06       |
| Test:15 NRSME    | 0.351      | 0.33                                       | 0.561                                     | 1.534                                     | 0.293                                      | 0.295                                     | 0.213                                     | 1.119                                       | 1.139                                            | 1.197                                          | 0.257                             | 0.541 | 2.892                        | 10.75                        | 0.665      |
| EMACJSBACH RSME  | 4.939      | 7.175                                      | 9.943                                     | 11.822                                    | 5.367                                      | 5.225                                     | 0.919                                     | 42.426                                      | 5.123                                            | 15.439                                         | 0.084                             | 0.02  | 0.042                        | 0.027                        | 0.06       |
| EMACJSBACH NRSME | 0.353      | 0.326                                      | 0.574                                     | 1.533                                     | 0.296                                      | 0.299                                     | 0.211                                     | 1.118                                       | 1.118                                            | 1.187                                          | 0.255                             | 0.559 | 2.884                        | 10.728                       | 0.658      |
| Test:17 RSME     | 4.897      | 7.46                                       | 9.58                                      | 12.068                                    | 5.159                                      | 5.08                                      | 1.414                                     | 43.32                                       | 4.976                                            | 16.21                                          | 0.102                             | 0.031 | 0.043                        | 0.027                        | 0.06       |
| Test:17 NRSME    | 0.35       | 0.339                                      | 0.553                                     | 1.564                                     | 0.284                                      | 0.291                                     | 0.325                                     | 1.142                                       | 1.086                                            | 1.246                                          | 0.311                             | 0.867 | 3.001                        | 10.651                       | 0.659      |
| Test:18 RSME     | 4.886      | 7.923                                      | 8.713                                     | 11.983                                    | 5.215                                      | 4.976                                     | 1.159                                     | 43.144                                      | 5.019                                            | 16.072                                         | 0.098                             | 0.027 | 0.043                        | 0.027                        | 0.06       |
| Test:18 NRSME    | 0.349      | 0.36                                       | 0.503                                     | 1.553                                     | 0.287                                      | 0.285                                     | 0.267                                     | 1.137                                       | 1.096                                            | 1.235                                          | 0.296                             | 0.763 | 2.979                        | 10.657                       | 0.662      |
| Test:19 RSME     | 4.881      | 8.376                                      | 7.986                                     | 11.892                                    | 5.349                                      | 5.078                                     | 1.03                                      | 43.044                                      | 5.074                                            | 16.026                                         | 0.097                             | 0.024 | 0.043                        | 0.027                        | 0.06       |
| Test:19 NRSME    | 0.349      | 0.38                                       | 0.461                                     | 1.542                                     | 0.295                                      | 0.291                                     | 0.237                                     | 1.134                                       | 1.108                                            | 1.232                                          | 0.296                             | 0.671 | 2.956                        | 10.749                       | 0.658      |
| Test:20 RSME     | 4.88       | 9.044                                      | 7.131                                     | 11.839                                    | 5.6                                        | 5.441                                     | 0.909                                     | 42.858                                      | 5.205                                            | 15.966                                         | 0.092                             | 0.02  | 0.042                        | 0.027                        | 0.06       |
| Test:20 NRSME    | 0.349      | 0.411                                      | 0.411                                     | 1.535                                     | 0.308                                      | 0.312                                     | 0.209                                     | 1.129                                       | 1.136                                            | 1.227                                          | 0.28                              | 0.554 | 2.936                        | 10.765                       | 0.66       |
| Test:21 RSME     | 4.869      | 9.771                                      | 6.328                                     | 11.77                                     | 5.967                                      | 6.029                                     | 0.991                                     | 42.64                                       | 5.193                                            | 15.73                                          | 0.086                             | 0.016 | 0.042                        | 0.027                        | 0.06       |
| Test:21 NRSME    | 0.348      | 0.444                                      | 0.365                                     | 1.526                                     | 0.329                                      | 0.345                                     | 0.228                                     | 1.124                                       | 1.134                                            | 1.209                                          | 0.261                             | 0.455 | 2.883                        | 10.853                       | 0.665      |
| Test:22 RSME     | 4.88       | 9.044                                      | 7.131                                     | 11.839                                    | 5.6                                        | 5.441                                     | 0.909                                     | 42.858                                      | 5.205                                            | 15.966                                         | 0.092                             | 0.02  | 0.042                        | 0.027                        | 0.06       |
| Test:22 NRSME    | 0.349      | 0.411                                      | 0.411                                     | 1.535                                     | 0.308                                      | 0.312                                     | 0.209                                     | 1.129                                       | 1.136                                            | 1.227                                          | 0.28                              | 0.554 | 2.936                        | 10.765                       | 0.66       |
| Test:23 RSME     | 4.935      | 9.206                                      | 4.79                                      | 8.052                                     | 7.276                                      | 8.439                                     | 1.936                                     | 45.337                                      | 4.89                                             | 18.198                                         | 0.151                             | 0.007 | 0.03                         | 0.018                        | 0.061      |
| Test:23 NRSME    | 0.353      | 0.418                                      | 0.276                                     | 1.044                                     | 0.401                                      | 0.483                                     | 0.445                                     | 1.195                                       | 1.068                                            | 1.399                                          | 0.458                             | 0.198 | 2.099                        | 7.021                        | 0.678      |
| Test:24 RSME     | 4.965      | 8.823                                      | 4.604                                     | 6.443                                     | 7.79                                       | 9.486                                     | 2.422                                     | 46.54                                       | 4.746                                            | 19.287                                         | 0.184                             | 0.011 | 0.026                        | 0.014                        | 0.062      |
| Test:24 NRSME    | 0.355      | 0.401                                      | 0.266                                     | 0.835                                     | 0.429                                      | 0.543                                     | 0.557                                     | 1.226                                       | 1.036                                            | 1.483                                          | 0.559                             | 0.316 | 1.809                        | 5.697                        | 0.683      |
| Test:25 RSME     | 4.969      | 8.561                                      | 4.626                                     | 5.488                                     | 8.026                                      | 10.118                                    | 2.827                                     | 47.213                                      | 4.649                                            | 19.878                                         | 0.203                             | 0.016 | 0.024                        | 0.013                        | 0.062      |
| Test:25 NRSME    | 0.355      | 0.389                                      | 0.267                                     | 0.711                                     | 0.442                                      | 0.579                                     | 0.65                                      | 1.244                                       | 1.015                                            | 1.528                                          | 0.615                             | 0.453 | 1.653                        | 5.024                        | 0.689      |
| Test:26 RSME     | 4.987      | 8.377                                      | 4.666                                     | 4.949                                     | 8.176                                      | 10.407                                    | 2.944                                     | 47.659                                      | 4.635                                            | 20.322                                         | 0.217                             | 0.019 | 0.023                        | 0.012                        | 0.062      |
| Test:26 NRSME    | 0.356      | 0.38                                       | 0.269                                     | 0.642                                     | 0.45                                       | 0.596                                     | 0.677                                     | 1.256                                       | 1.012                                            | 1.562                                          | 0.66                              | 0.541 | 1.58                         | 4.618                        | 0.681      |
| Test:27 RSME     | 4.992      | 8.209                                      | 4.7                                       | 4.545                                     | 8.235                                      | 10.59                                     | 3.077                                     | 47.941                                      | 4.557                                            | 20.531                                         | 0.226                             | 0.022 | 0.022                        | 0.011                        | 0.062      |
| Test:27 NRSME    | 0.357      | 0.373                                      | 0.271                                     | 0.589                                     | 0.453                                      | 0.607                                     | 0.707                                     | 1.263                                       | 0.995                                            | 1.578                                          | 0.686                             | 0.621 | 1.514                        | 4.293                        | 0.686      |
| Test:28 RSME     | 5.016      | 8.089                                      | 4.777                                     | 4.111                                     | 8.355                                      | 10.912                                    | 3.28                                      | 48.299                                      | 4.46                                             | 20.798                                         | 0.236                             | 0.025 | 0.021                        | 0.01                         | 0.062      |
| Test:28 NRSME    | 0.358      | 0.367                                      | 0.276                                     | 0.533                                     | 0.46                                       | 0.625                                     | 0.754                                     | 1.273                                       | 0.974                                            | 1.599                                          | 0.716                             | 0.709 | 1.438                        | 3.944                        | 0.687      |
| Test:29 RSME     | 5.001      | 8.001                                      | 4.794                                     | 3.931                                     | 8.362                                      | 10.975                                    | 3.338                                     | 48.444                                      | 4.494                                            | 20.98                                          | 0.24                              | 0.027 | 0.021                        | 0.01                         | 0.062      |
| Test:29 NRSME    | 0.357      | 0.363                                      | 0.277                                     | 0.51                                      | 0.46                                       | 0.629                                     | 0.767                                     | 1.277                                       | 0.981                                            | 1.613                                          | 0.73                              | 0.758 | 1.421                        | 3.825                        | 0.687      |
| Test:30 RSME     | 5.061      | 6.618                                      | 8.048                                     | 7.085                                     | 5.16                                       | 5.29                                      | 2.148                                     | 45.935                                      | 4.814                                            | 18.735                                         | 0.18                              | 0.015 | 0.024                        | 0.012                        | 0.063      |
| Test:30 NRSME    | 0.362      | 0.301                                      | 0.464                                     | 0.918                                     | 0.284                                      | 0.303                                     | 0.494                                     | 1.21                                        | 1.051                                            | 1.44                                           | 0.547                             | 0.42  | 1.681                        | 4.933                        | 0.696      |
| Test:32 RSME     | 5.096      | 6.641                                      | 7.234                                     | 5.55                                      | 5.176                                      | 5.763                                     | 2.639                                     | 47.032                                      | 4.675                                            | 19.72                                          | 0.213                             | 0.023 | 0.021                        | 0.01                         | 0.063      |
| Test:32 NRSME    | 0.364      | 0.302                                      | 0.417                                     | 0.72                                      | 0.285                                      | 0.33                                      | 0.607                                     | 1.239                                       | 1.021                                            | 1.516                                          | 0.646                             | 0.639 | 1.455                        | 3.888                        | 0.692      |
| Test:33 RSME     | 5.103      | 6.652                                      | 7.05                                      | 5.239                                     | 5.196                                      | 5.901                                     | 2.715                                     | 47.327                                      | 4.649                                            | 19.994                                         | 0.221                             | 0.026 | 0.02                         | 0.009                        | 0.062      |
| Test:33 NRSME    | 0.365      | 0.302                                      | 0.407                                     | 0.679                                     | 0.286                                      | 0.338                                     | 0.624                                     | 1.247                                       | 1.015                                            | 1.537                                          | 0.67                              | 0.731 | 1.417                        | 3.696                        | 0.688      |
| Test:34 RSME     | 5.106      | 6.75                                       | 9.431                                     | 7.269                                     | 5.368                                      | 4.993                                     | 2.097                                     | 45.914                                      | 4.795                                            | 18.691                                         | 0.182                             | 0.013 | 0.024                        | 0.013                        | 0.062      |
| Test:34 NRSME    | 0.365      | 0.307                                      | 0.544                                     | 0.942                                     | 0.296                                      | 0.286                                     | 0.482                                     | 1.21                                        | 1.047                                            | 1.437                                          | 0.554                             | 0.367 | 1.678                        | 4.995                        | 0.682      |
| Test:35 RSME     | 5.044      | 6.939                                      | 5.466                                     | 5.533                                     | 5.733                                      | 6.987                                     | 2.575                                     | 46.752                                      | 4.658                                            | 19.413                                         | 0.194                             | 0.016 | 0.024                        | 0.012                        | 0.062      |
| Test:35 NRSME    | 0.36       | 0.315                                      | 0.315                                     | 0.717                                     | 0.316                                      | 0.4                                       | 0.592                                     | 1.232                                       | 1.017                                            | 1.492                                          | 0.59                              | 0.463 | 1.636                        | 4.909                        | 0.68       |
